# Supplementary material for: Protective Effects of Lignin-Carbohydrate Complexes from Wheat Stalk against Bisphenol a Neurotoxicity in Zebrafish via Oxidative Stress
Source: MDPI journal article supplement (doi:10.3390/antiox10101640), 2021-10-18
Supplement: s1 [file s1]

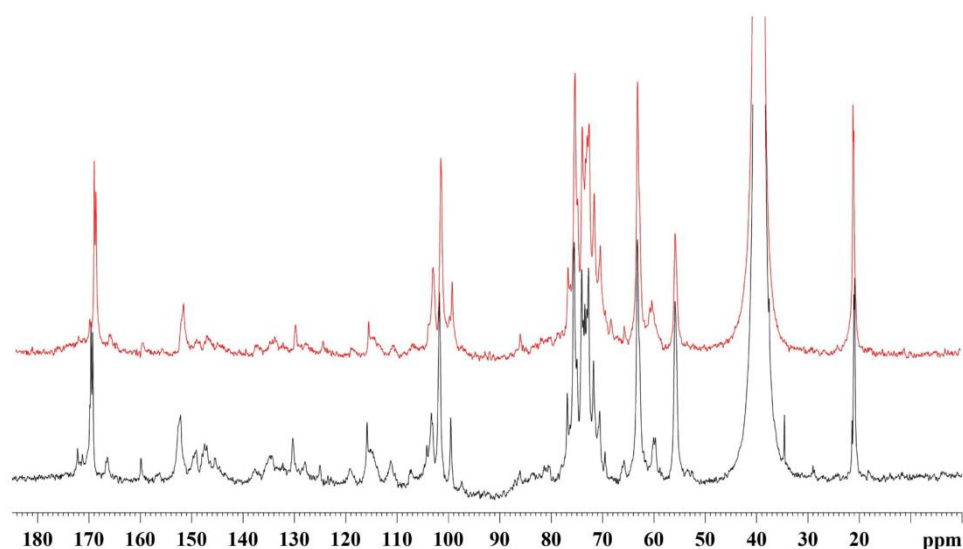

**Figure S1.** The  $^{13}\text{C}$  NMR spectra of LCC-WS-A (red) and LCC-WS-B (black).

**Table S1.** Sequences of primers for the genes tested.

| Name             | Gene no.     | Primer sequence                                                                    |
|------------------|--------------|------------------------------------------------------------------------------------|
| <i>Cu/Zn-Sod</i> | NM_131294.1  | Forward: 5'-GTCGTCTGGCTTGTGGAGTG-3'<br>Reverse: 5'-TGTCAGCGGGCTAGTGCTT-3'          |
| <i>Cat</i>       | NM_130912.2  | Forward: 5'-AGGGCAACTGGGATCTTACA-3'<br>Reverse: 5'-TTTATGGGACCAGACCTTGG-3'         |
| <i>mbp</i>       | AY860977     | Forward: 5'-AATCAGCAGGTTCTTCGGAGGAGA-3'<br>Reverse: 5'-AAGAAATGCACGACAGGGTTGACG-3' |
| <i>syn2a</i>     | NM_001002597 | Forward: 5'-GTGACCATGCCAGCATTTTC-3'<br>Reverse: 5'-TGTTTCTCCACTTTTCACCTT-3'        |
| $\beta$ -actin   | AF025305     | Forward: 5'-ACAGGGAAAAGATGACACAGATCA-3'<br>Reverse: 5'-CAGCCTGGATGGCAACGTA-3'      |
